# Supplementary material for: All-Inorganic Intumescent Nanocoating Containing Montmorillonite Nanoplatelets in Ammonium Polyphosphate Matrix Capable of Preventing Cotton Ignition
Source: MDPI journal article supplement (doi:10.3390/polym8120430), 2016-12-10
Supplement: s1 [file s1]

# Supplementary Materials: All-Inorganic Intumescent Nanocoating Containing Montmorillonite Nanoplatelets in Ammonium Polyphosphate Matrix Capable of Preventing Cotton Ignition

Jenny Alongi and Federico Carosio

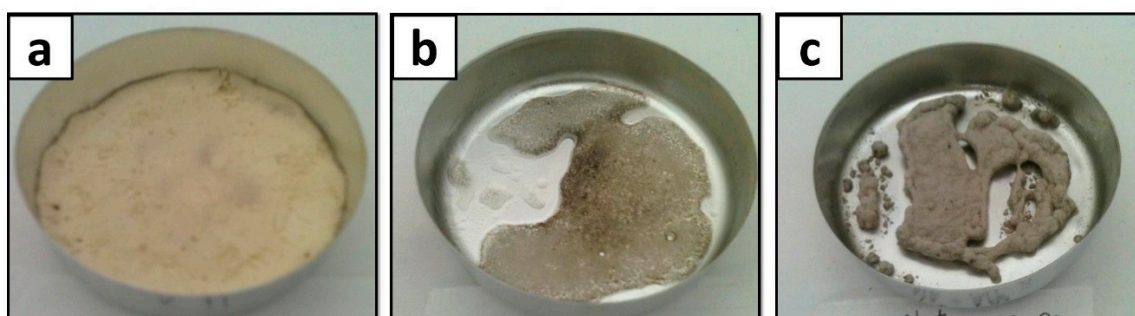

**Figure S1.** Images of MTM (a); APP (b) and mixture of APP/MTM (c) after irradiation under 35 kW/m<sup>2</sup> heat flux in a cone calorimeter.

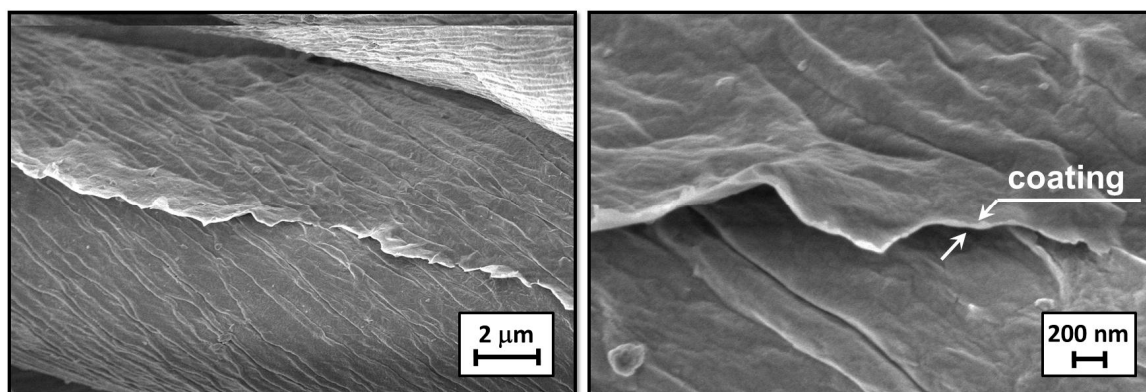

**Figure S2.** FE-SEM micrographs of defects in 2.5% APP/MTM sample.

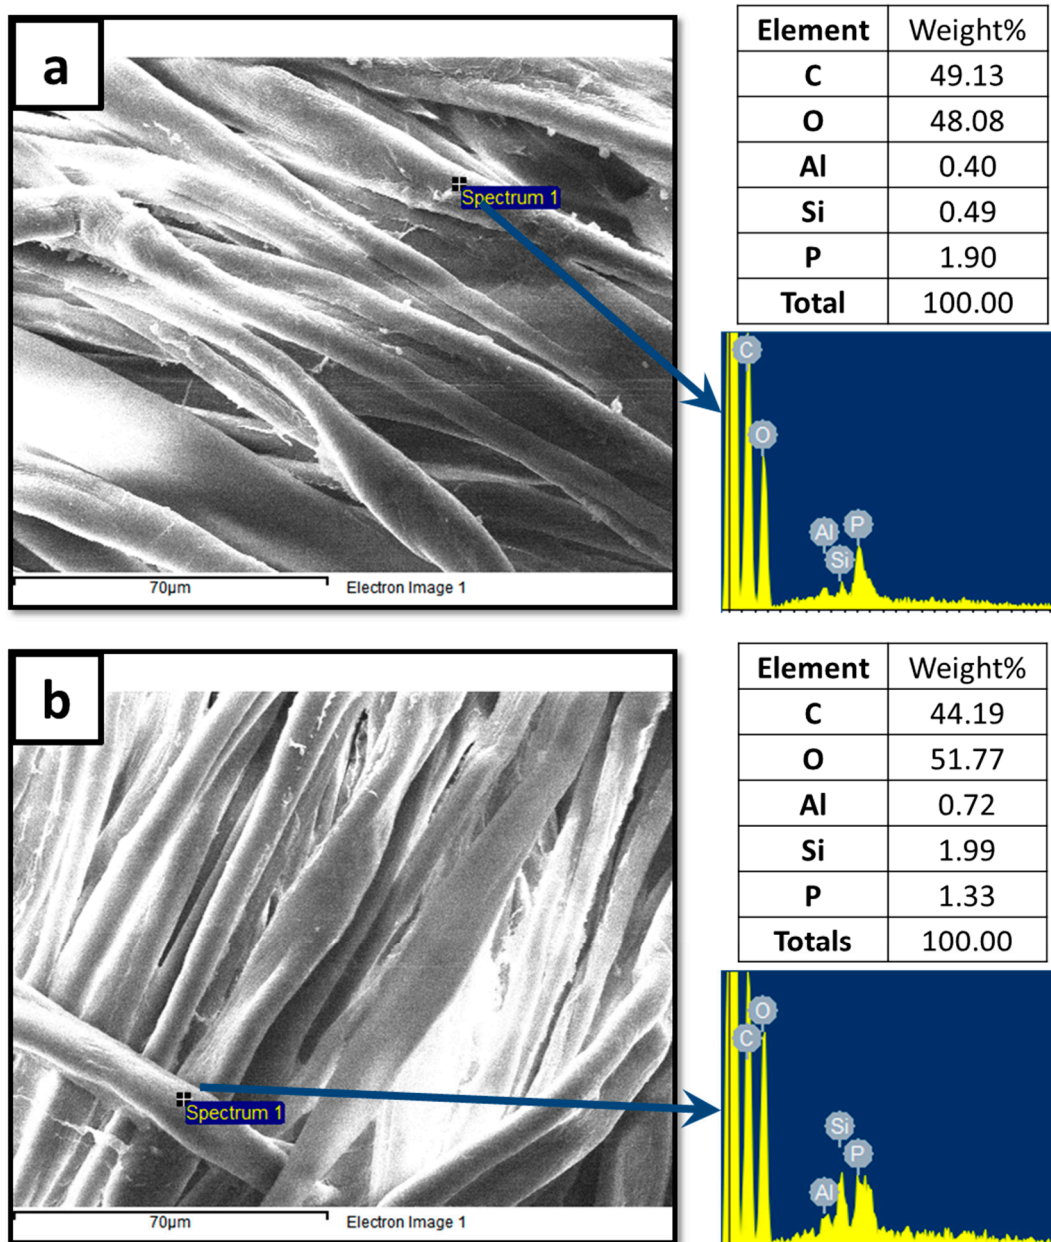

**Figure S3.** EDS analyses performed on 2.5% APP/MTM (a) and 5% APP/MTM (b) samples.

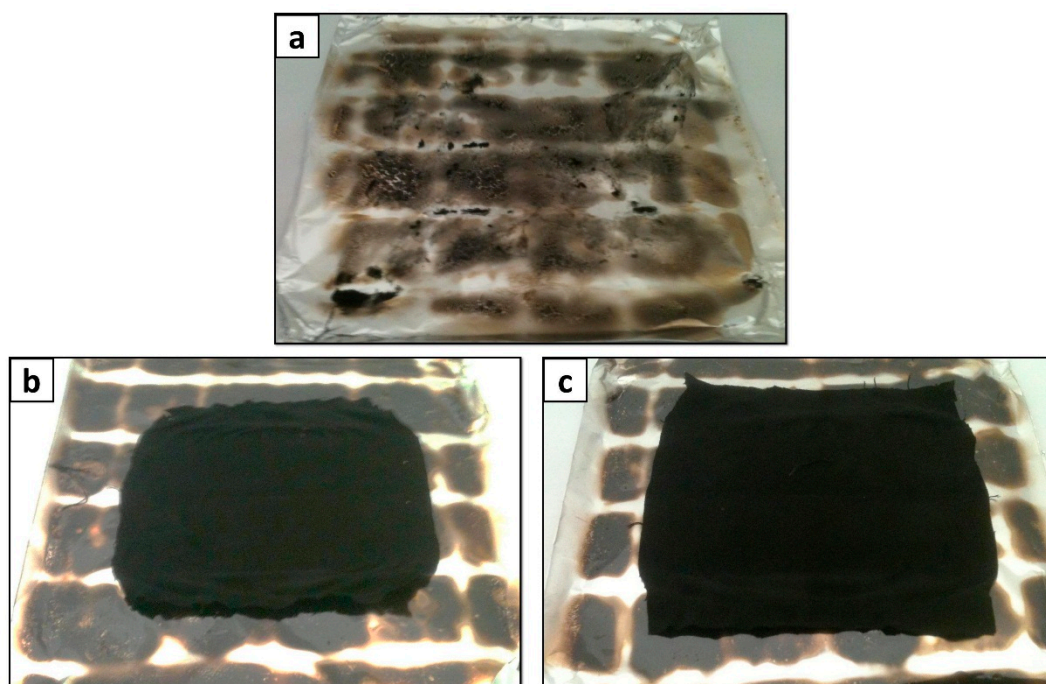

**Figure S4.** Images of residues collected at the end of cone calorimetry tests: (a) untreated cotton, (b) 2.5% APP/MTM and (c) 5% APP/MTM samples.

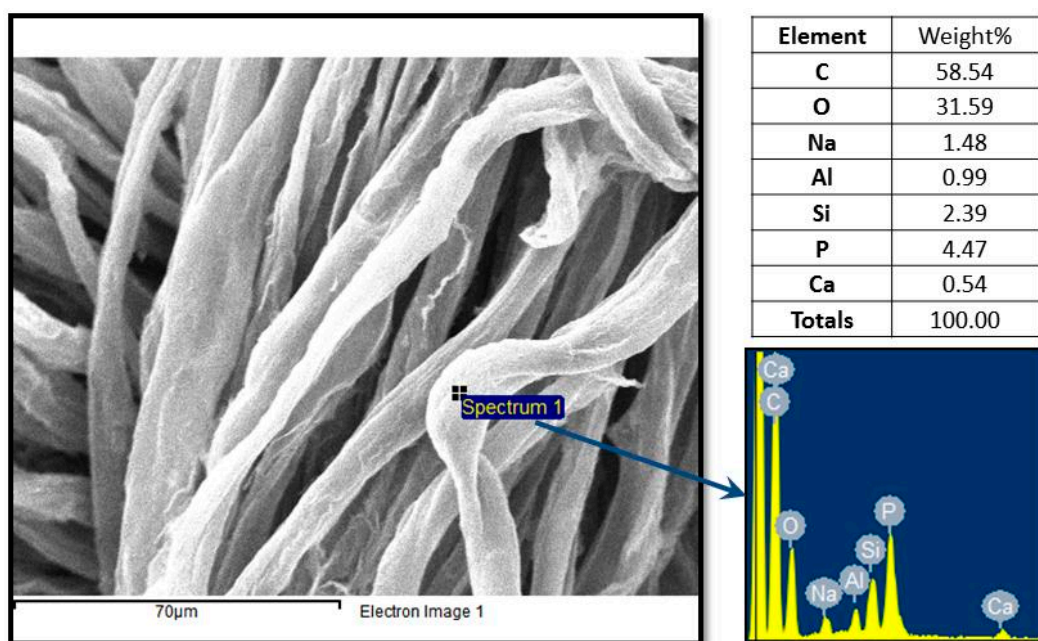

**Figure S5.** EDS analyses performed on 5% APP/MTM residues collected at the end of cone calorimetry tests.
